# Supplementary material for: Bromine domain protein 4 is an important marker for prognosis of ovarian cancer and tumor immune infiltration
Source: Research Square preprint supplement (doi:10.21203/rs.3.rs-270956/v1), 2021-03-08
Supplement: Supplementary file 1 [file 9eacf88ad737c56114d29624.docx]

**Table 1: Relationship between BRD4 expression and clinical prognosis of OC** **patients.**

**Table 2: Correlation analysis between BRD4 expression and immune markers in OC (TIMER).**
